# Supplementary material for: One-pot synthesis of CuFe2O4magnetic nanocrystal clusters for highly specific separation of histidine-rich proteins
Source: Royal Society of Chemistry journal article supplement (doi:10.1039/c4tb00986j), 2014-01-01
Supplement: c4tb00986j1.pdf [file c4tb00986j1.pdf]

1

## Supporting information

2 One-pot synthesis of  $\text{CuFe}_2\text{O}_4$  magnetic nanocrystal clusters for  
3 highly specific separation of histidine-rich proteins

4 *Jiangnan Zheng, Zian Lin,\* Wei Liu, Ling Wang, Sen Zhao, Huanghao Yang, and Lan*  
5 *Zhang\*\**

6 *Ministry of Education Key Laboratory of Analysis and Detection for Food Safety, Fujian*  
7 *Provincial Key Laboratory of Analysis and Detection Technology for Food Safety, Department of*  
8 *Chemistry, Fuzhou University, Fuzhou, Fujian, 350108, China*

9

10

11 ● First corresponding author: **Zian Lin**;

12 ● Second corresponding author: **Lan Zhang**

13 ● Postal address: **College of Chemistry, Fuzhou University, Fuzhou,**  
14 **Fujian, 350116, China**

15 ● Fax: **86-591-22866135**

16 ● E-mail: **zianlin@fzu.edu.cn (Z.A. Lin); zlan@fzu.edu.cn (L.Zhang);**

17

18

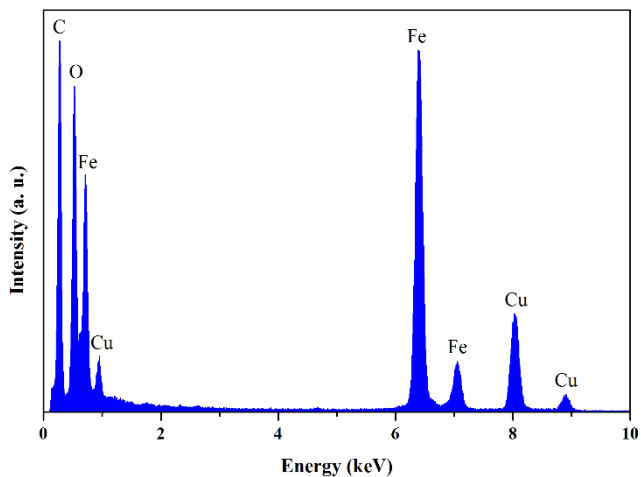

19

20 **Fig. S1.** EDS spectrum of  $\text{CuFe}_2\text{O}_4$  MNCs.

21

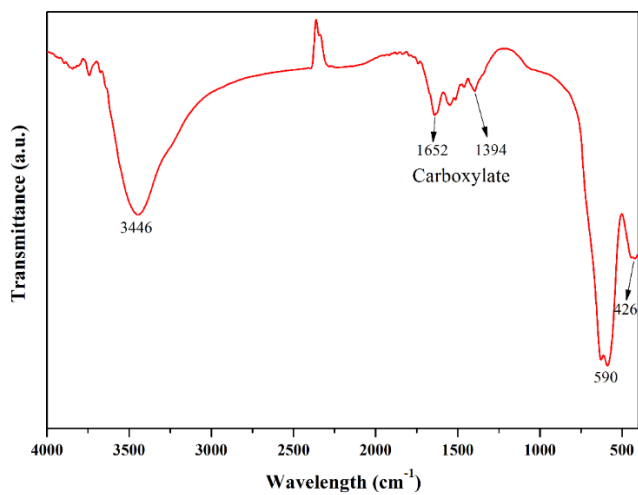

22

23 **Fig. S2.** FT-IR spectrum of  $\text{CuFe}_2\text{O}_4$  MNCs. The bands at 1652 and 1394  $\text{cm}^{-1}$  was assigned to  
 24 carboxylate group. The main absorption bands at 590 and 426  $\text{cm}^{-1}$  corresponds to the vibration  
 25 modes of spinel compounds. The broad absorption band at 3446  $\text{cm}^{-1}$  represents the stretching  
 26 mode of  $-\text{OH}$  groups of absorbed  $\text{H}_2\text{O}$  molecules.

27

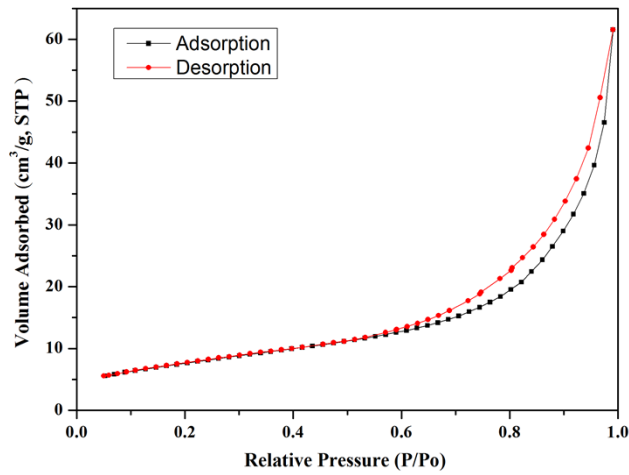

28

29 **Fig. S3.** N<sub>2</sub> adsorption-desorption isotherm of CuFe<sub>2</sub>O<sub>4</sub> MMCs.

30

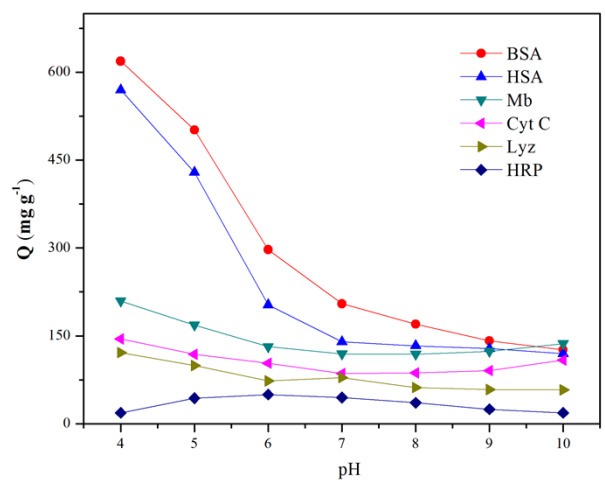

31

32 **Fig. S4** pH dependence of the adsorption capacities of proteins (BSA, HSA, Mb, Cyt C, Lyz and  
 33 HRP) in phosphate buffer (pH 4.0-10.0) by CuFe<sub>2</sub>O<sub>4</sub> MMCs.

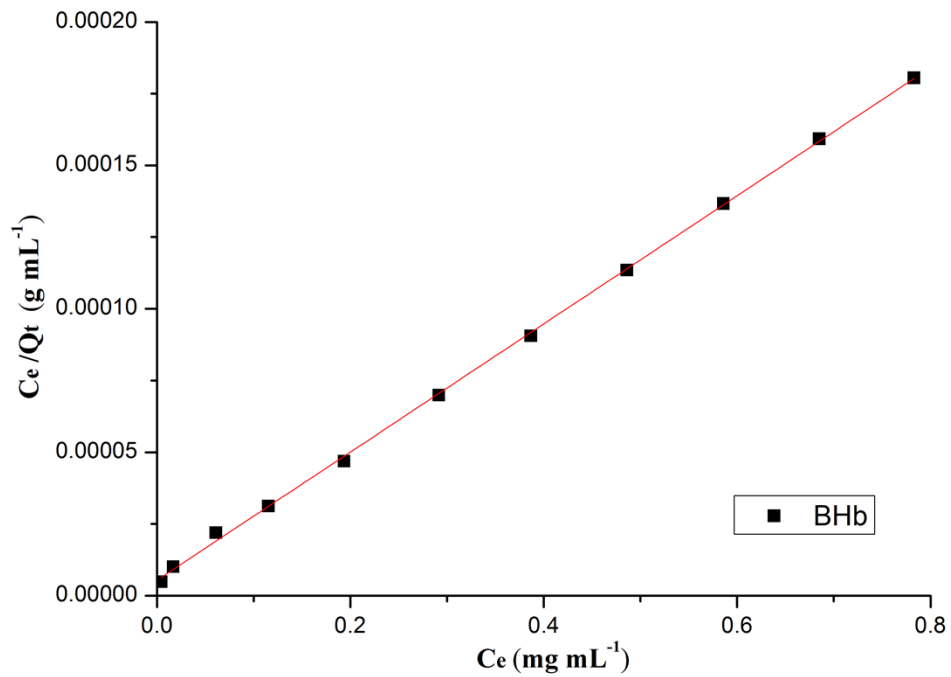

34

35 **Fig. S5-1** Fitting of the adsorption isotherm of BHB on the CuFe<sub>2</sub>O<sub>4</sub> MNCs by using the  
36 Langmuir model. The fitted parameters are summarized in Table 3.

37

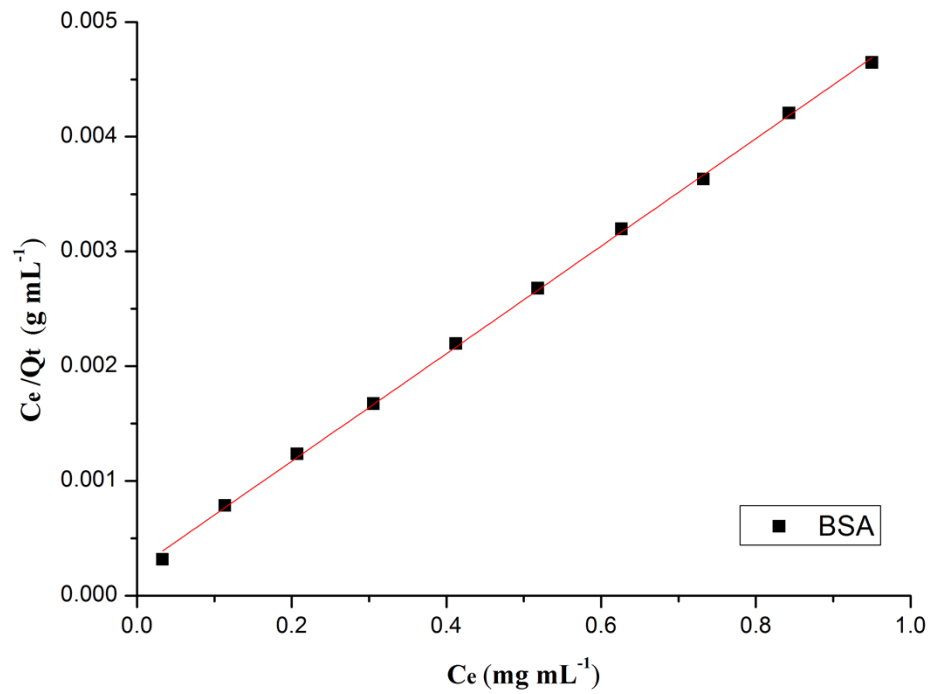

38

39 **Fig. S5-2** Fitting of the adsorption isotherm of BSA on the CuFe<sub>2</sub>O<sub>4</sub> MNCs by using the  
40 Langmuir model. The fitted parameters are summarized in Table 3.

41

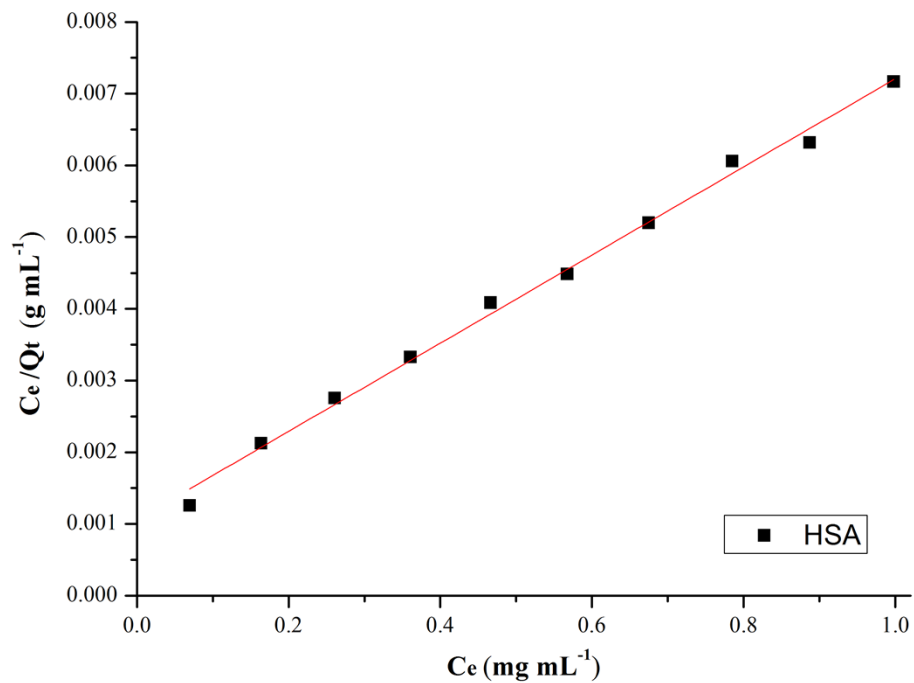

42

43 **Fig. S5-3** Fitting of the adsorption isotherm of HSA on the CuFe<sub>2</sub>O<sub>4</sub> MNCs by using the  
44 Langmuir model. The fitted parameters are summarized in Table 3.

45

46

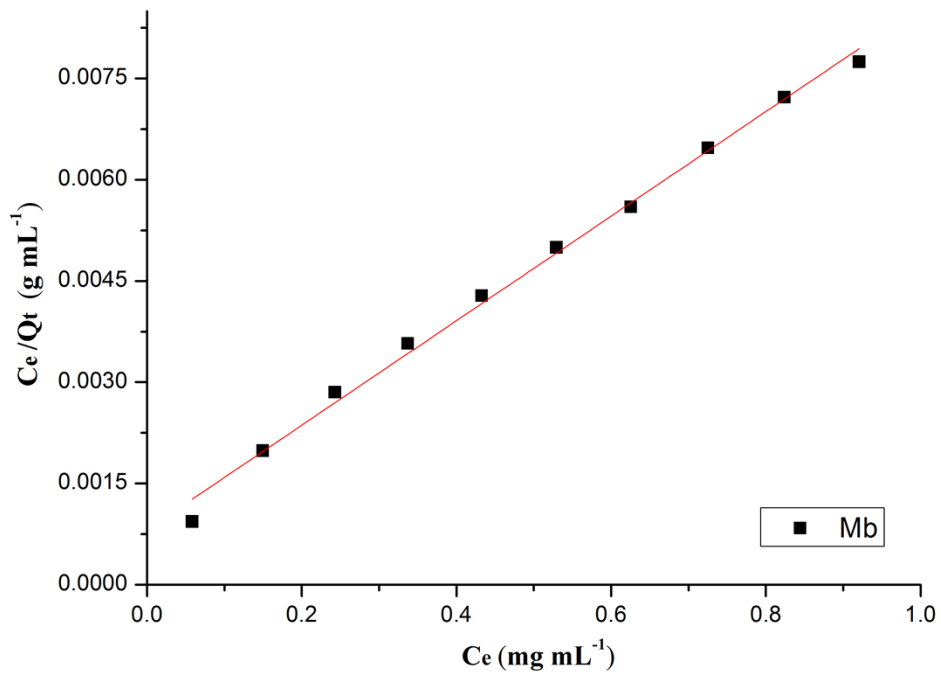

47

48 **Fig. S5-4** Fitting of the adsorption isotherm of Mb on the CuFe<sub>2</sub>O<sub>4</sub> MNCs by using the Langmuir  
49 model. The fitted parameters are summarized in Table 3.

50

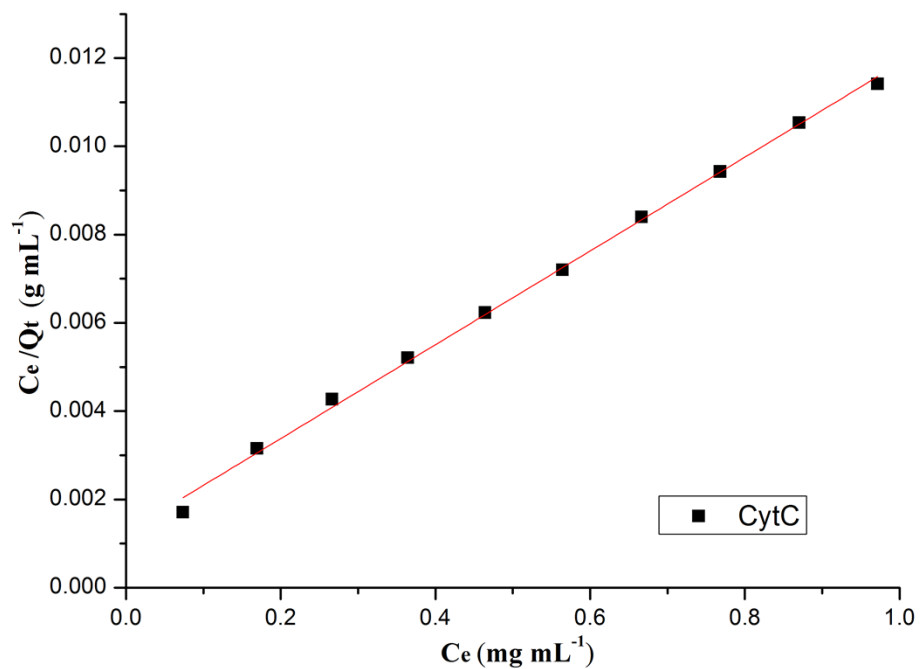

51

52 **Fig. S5-5** Fitting of the adsorption isotherm of CytC on the CuFe<sub>2</sub>O<sub>4</sub> MNCs by using the  
53 Langmuir model. The fitted parameters are summarized in Table 3.

54



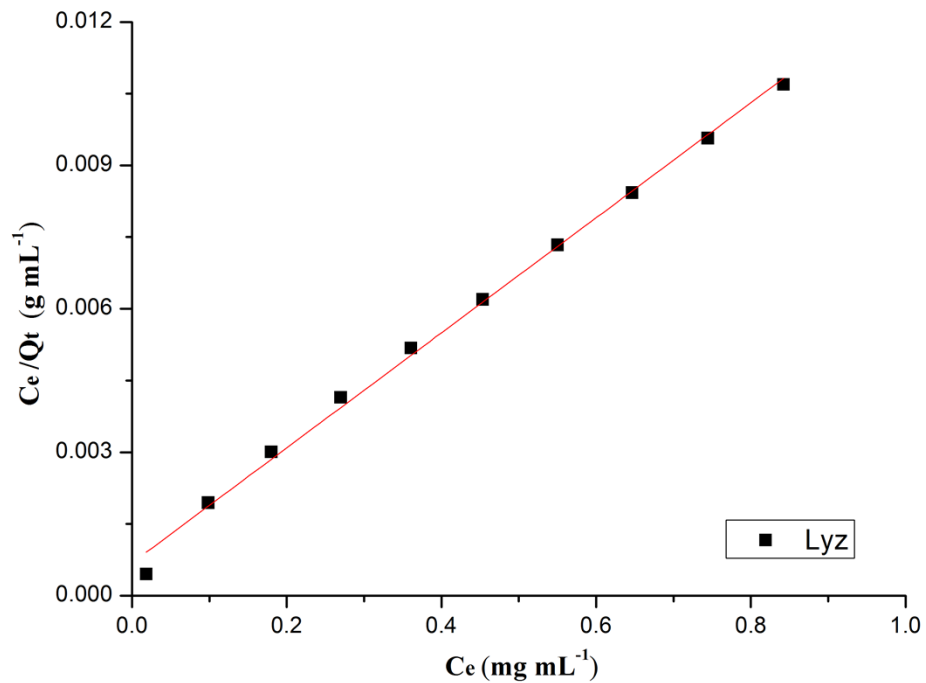

55

56 **Fig. S5-6** Fitting of the adsorption isotherm of Lyz on the CuFe<sub>2</sub>O<sub>4</sub> MNCs by using the Langmuir  
57 model. The fitted parameters are summarized in Table 3.

58

59

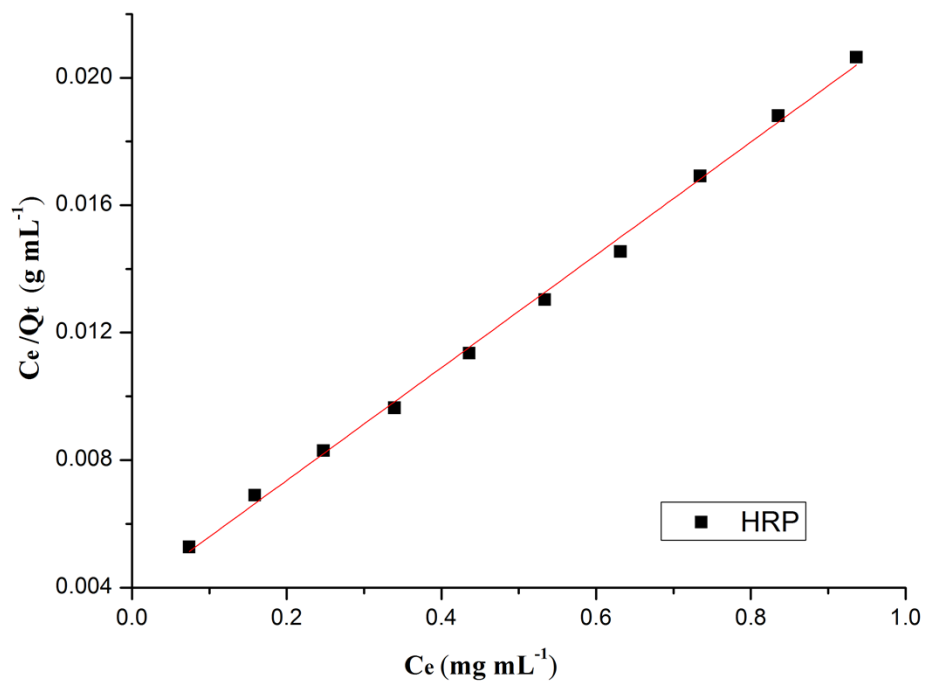

60

61 **Fig. S5-7** Fitting of the adsorption isotherm of HRP on the CuFe<sub>2</sub>O<sub>4</sub> MNCs by using the  
62 Langmuir model. The fitted parameters are summarized in Table 3.

63

64

65

66

67

68

69

70

71

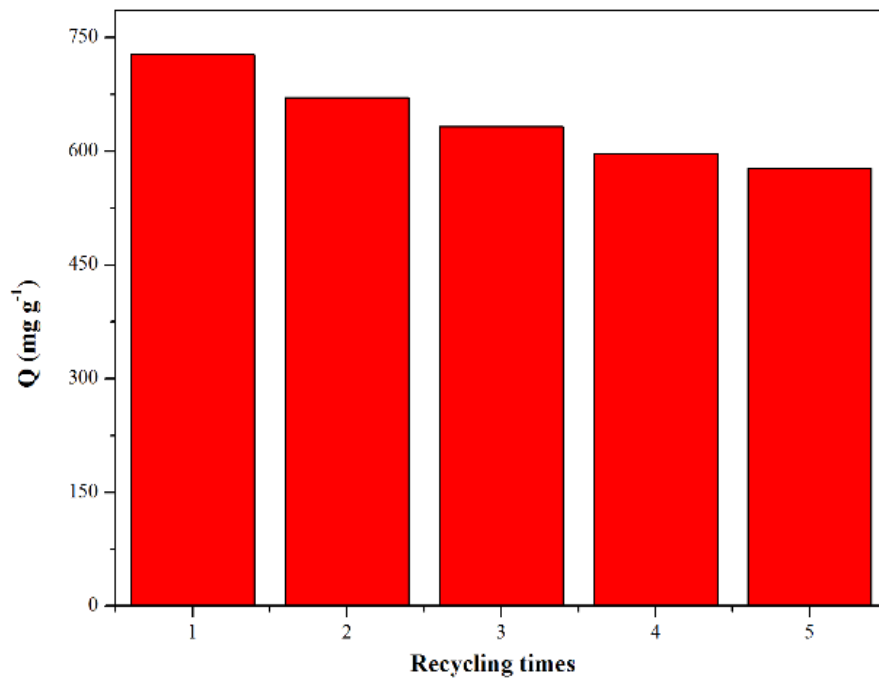

72

73 **Fig. S6** Recycled use of the CuFe<sub>2</sub>O<sub>4</sub> MNCs for BHb adsorption. Amount of CuFe<sub>2</sub>O<sub>4</sub> MNCs: 0.2  
74 mg; volume: 0.5 mL; binding media: 20 mM PBS (pH 7.0); incubation time: 10 min; C<sub>BHb</sub>: 0.80  
75 mg mL<sup>-1</sup>.

76

77

78

79

80

81

82

83

84

85

86
